# Supplementary material for: Carbon emission and water use efficiency response to tillage methods and planting patterns of winter wheat in the North China Plain
Source: PeerJ. 2020 Sep 15;8:e9912. doi: 10.7717/peerj.9912 (PMC7500349; doi:10.7717/peerj.9912)
Supplement: Supplemental Information 1 — NTC, no tillage with conventional planting; NTW, no tillage with wide-precision planting; TC conventional tillage with conventional planting; TW conventional tillage with wide-precision planting. [file peerj-08-9912-s001.xlsx]

## Sheet: Sheet1
	seeding stage				wintering period				jointing stage				heading stage				milking stage				mature stage
2015-2016	ppm	temperature	CO2 flux of the soil surface (μg m-2 h-1)	M1	ppm	temperature	CO2 flux of the soil surface (μg m-2 h-1)	M2	ppm	temperature	CO2 flux of the soil surface (μg m-2 h-1)	M3	ppm	temperature	CO2 flux of the soil surface (μg m-2 h-1)	M4	ppm	temperature	CO2 flux of the soil surface (μg m-2 h-1)	M5	ppm	temperature	CO2 flux of the soil surface (μg m-2 h-1)
NTW1	0.232009	18.1	0.00259641	1.6468	0.022328	3.96667	0.000262624	4.25271	0.253846	12	0.0029016	3.30734	0.545284	23.6	0.00598911	2.31973	0.34296	30.9	0.00367641	1.81242	0.361516	30.9	0.00387533	13.339
NTW1	0.234694	18.1	0.00262646	1.64403	0.0193237	3.4	0.000227752	3.9345	0.236266	12.1	0.0026997	3.29455	0.56129	24	0.00615662	2.25817	0.303907	31.4	0.00325243	1.27627	0.192988	31.4	0.00206537
NTW1	0.235758	18.1	0.00263836	1.6675	0.0218579	4.5	0.0002566	3.90968	0.232044	12	0.00265239	3.63504	0.648613	23.8	0.00711923	2.75764	0.408958	31.8	0.00437094	1.86131	0.316667	31.8	0.00338453
TW1	0.198473	18.0333	0.00222162	1.95699	0.1	4.03333	0.00117592	6.00457	0.288182	12.2	0.00329176	3.21488	0.486966	23.5	0.00535039	3.73872	0.959752	32.7	0.0102276	3.31174	0.335129	32.7	0.00357131
TW1	0.207191	18.0333	0.00231921	1.70081	0.0538802	4.03333	0.000633591	5.29689	0.289665	12.3	0.00330754	3.17755	0.476879	23.8	0.00523427	3.43416	0.854907	33.9	0.00907472	3.23741	0.415879	33.9	0.0044145
TW1	0.203125	18.1333	0.00227291	1.55852	0.0368098	4.03333	0.000432856	5.23221	0.30303	12.3	0.00346016	3.13224	0.453704	25	0.00495984	3.41761	0.879395	35.7	0.00928023	3.09905	0.344214	35.7	0.00363248
NTC1	0.142564	18.2667	0.00159452	1.17998	0.0387097	4.73333	0.000454049	4.87807	0.278293	12.5	0.00317547	3.47831	0.561622	23.3	0.00617482	2.53785	0.412175	32.2	0.00439955	1.7969	0.289256	32.2	0.00308752
NTC1	0.139615	18.2	0.0015619	1.0509	0.0223881	4.76667	0.000262572	4.54029	0.273048	12.5	0.00311562	3.51217	0.575733	23.5	0.00632569	2.53913	0.398671	32.3	0.00425402	1.79052	0.300501	32.3	0.00320649
NTC1	0.136667	18.2333	0.00152874	1.05964	0.0265289	4.96667	0.000310913	4.81852	0.286954	12.5	0.0032743	3.68238	0.602327	23.2	0.00662459	2.67213	0.422457	32.2	0.0045093	1.94587	0.337129	32.2	0.00359851
TC1	0.32788	18.4333	0.00366511	2.66651	0.0821563	4.56667	0.000964239	7.61475	0.412032	12.5	0.0047015	4.34083	0.633283	23.1	0.0069674	3.97851	0.9	32.1	0.00960974	3.21748	0.355556	32.1	0.00379644
TC1	0.327438	18.6667	0.00365724	2.66057	0.0818987	4.4	0.000961794	7.79599	0.424064	12.5	0.00483879	4.19043	0.584057	23.1	0.00642581	3.85688	0.9	31	0.00964451	3.31671	0.38961	31	0.00417511
TC1	0.326996	18.9667	0.00364855	2.65904	0.0824138	4.4	0.000967843	7.43507	0.4	12.5	0.00456421	4.49123	0.682509	23.1	0.00750898	4.1176	0.9	30.9	0.00964769	3.34291	0.399369	30.9	0.0042811
	M1	M2	M3	M4	M5
NTW1	1.65278	4.0323	3.41231	2.44518	1.65
TW1	1.73877	5.51122	3.17489	3.53017	3.21607
NTC1	1.09684	4.74563	3.55762	2.58304	1.84443
TC1	2.66204	7.61527	4.34083	3.98433	3.29237
	the cumulative CO2-C emissions (kg CO2 ha-1)
	seeding stage	wintering period	jointing stage	heading stage	milking stage	mature stage
NTW1	0	1.65278	5.68507	9.09739	11.5426	13.1926
TW1	0	1.73877	7.24999	10.4249	13.9551	17.1711
NTC1	0	1.09684	5.84247	9.40008	11.9831	13.8276
TC1	0	2.66204	10.2773	14.6181	18.6025	21.8948
							the cumulative CO2-C emissions (kg CO2 ha-1)	from seeding stage to every mearsurement stage
2015-2016	M1	M2	M3	M4	M5			seeding stage	wintering period	jointing stage	heading stage	milking stage	mature stage
NTW1	1.6468	4.25271	3.30734	2.31973	1.81242		NTW1	0	1.6468	5.89952	9.20686	11.5266	13.339
NTW1	1.64403	3.9345	3.29455	2.25817	1.27627		NTW1	0	1.64403	5.57852	8.87307	11.1312	12.4075
NTW1	1.6675	3.90968	3.63504	2.75764	1.86131		NTW1	0	1.6675	5.57718	9.21222	11.9699	13.8312
TW1	1.95699	6.00457	3.21488	3.73872	3.31174		TW1	0	1.95699	7.96156	11.1764	14.9152	18.2269
TW1	1.70081	5.29689	3.17755	3.43416	3.23741		TW1	0	1.70081	6.9977	10.1753	13.6094	16.8468
TW1	1.55852	5.23221	3.13224	3.41761	3.09905		TW1	0	1.55852	6.79073	9.92297	13.3406	16.4396
NTC1	1.17998	4.87807	3.47831	2.53785	1.7969		NTC1	0	1.17998	6.05805	9.53635	12.0742	13.8711
NTC1	1.0509	4.54029	3.51217	2.53913	1.79052		NTC1	0	1.0509	5.59119	9.10335	11.6425	13.433
NTC1	1.05964	4.81852	3.68238	2.67213	1.94587		NTC1	0	1.05964	5.87816	9.56055	12.2327	14.1786
TC1	2.66651	7.61475	4.34083	3.97851	3.21748		TC1	0	2.66651	10.2813	14.6221	18.6006	21.8181
TC1	2.66057	7.79599	4.19043	3.85688	3.31671		TC1	0	2.66057	10.4566	14.647	18.5039	21.8206
TC1	2.65904	7.43507	4.49123	4.1176	3.34291		TC1	0	2.65904	10.0941	14.5853	18.7029	22.0459
	seeding stage				wintering period				jointing stage				heading stage				milking stage				mature stage
2016-2017	ppm	temperature	CO2 flux of the soil surface (μg m-2 h-1)	M1	ppm	temperature	CO2 flux of the soil surface (μg m-2 h-1)	M2	ppm	temperature	CO2 flux of the soil surface (μg m-2 h-1)	M3	ppm	temperature	CO2 flux of the soil surface (μg m-2 h-1)	M4	ppm	temperature	CO2 flux of the soil surface (μg m-2 h-1)	M5	ppm	temperature	CO2 flux of the soil surface (μg m-2 h-1)
NTW1	0.162009	18.1	0.00181304	1.46957	0.022328	3.96667	0.000262624	2.18362	0.206186	19	0.00230031	4.65369	0.712435	22.7	0.00784884	3.84068	0.268817	27.8	0.00291132	2.23437	0.261516	30.9	0.00280336
NTW1	0.134694	18.1	0.00150736	1.22846	0.0193237	3.4	0.000227752	2.44536	0.236847	19	0.00264238	4.79983	0.71629	21.9	0.00791271	3.75107	0.231579	27.8	0.00250803	1.98785	0.192988	31.4	0.00206537
NTW1	0.135758	18.1	0.00151926	1.25731	0.0218579	4.5	0.0002566	2.40787	0.231579	20.6	0.00256953	4.72984	0.704566	21.6	0.00779113	3.89418	0.292857	27.8	0.00317168	2.41614	0.316667	31.8	0.00338453
TW1	0.198473	18.0333	0.00222162	2.07244	0.06	4.03333	0.000705554	4.75484	0.441176	21.8	0.00487524	4.93715	0.547761	21.4	0.00606129	3.47769	0.306912	27.8	0.0033239	2.48937	0.335129	32.7	0.00357131
TW1	0.207191	18.0333	0.00231921	2.09058	0.0538802	4.03333	0.000633591	4.25591	0.394161	21.4	0.00436161	4.91988	0.590244	21.6	0.00652695	2.88517	0.0566802	27.8	0.000613853	2.08612	0.415879	33.9	0.0044145
TW1	0.203125	18.1333	0.00227291	1.91568	0.0368098	4.03333	0.000432856	4.03518	0.388889	21.4	0.00430327	4.85044	0.578075	21.6	0.00639238	3.54266	0.299065	27.8	0.00323892	2.48422	0.344214	35.7	0.00363248
NTC1	0.102564	18.2667	0.00114714	1.13364	0.0387097	4.73333	0.000454049	2.47737	0.217822	16.2	0.00245366	5.02659	0.792	22.5	0.0087313	3.57899	0.0958084	27.8	0.00103762	1.89103	0.289256	32.2	0.00308752
NTC1	0.119615	18.2	0.00133816	1.13332	0.0223881	4.76667	0.000262572	2.1412	0.2	16.5	0.00225057	4.37853	0.645161	21.6	0.00713423	3.66892	0.274725	27.8	0.00297531	2.33527	0.300501	32.3	0.00320649
NTC1	0.136667	18.2333	0.00152874	1.2195	0.0165289	4.96667	0.000193715	3.34986	0.333333	17.5	0.00373804	5.61924	0.822034	21.5	0.00909318	4.11967	0.251497	27.8	0.00272374	2.36561	0.337129	32.2	0.00359851
TC1	0.32788	18.4333	0.00366511	3.27758	0.0821563	4.56667	0.000964239	5.08228	0.441186	14.4	0.00500088	5.67449	0.721992	21.6	0.00798382	3.61877	0.17874	27.8	0.00193578	2.23816	0.355556	32.1	0.00379644
TC1	0.327438	18.6667	0.00365724	3.27028	0.0818987	4.4	0.000961794	5.76891	0.5125	14.4	0.00580923	6.12973	0.76506	22.3	0.00844002	3.72375	0.173333	27.8	0.00187722	2.3073	0.38961	31	0.00417511
TC1	0.326996	18.9667	0.00364855	3.26841	0.0824138	4.4	0.000967843	4.58387	0.389937	14.9	0.00441229	5.64778	0.771901	22.9	0.00849822	3.75818	0.18	27.8	0.00194942	2.34579	0.399369	30.9	0.0042811
	M1	M2	M3	M4	M5
NTW1	1.31845	2.34561	4.72779	3.82865	2.21279
TW1	2.02624	4.34864	4.90249	3.30184	2.35324
NTC1	1.16215	2.65614	5.00812	3.78919	2.1973
TC1	3.27209	5.14502	5.81734	3.70023	2.29709
							the cumulative CO2-C emissions (kg CO2 ha-1)	from seeding stage to every mearsurement stage
2016-2017	M1	M2	M3	M4	M5			seeding stage	wintering period	jointing stage	heading stage	milking stage	mature stage
NTW1	1.46957	2.18362	4.65369	3.84068	2.23437		NTW1	0	1.46957	3.65319	8.30689	12.1476	14.3819
NTW1	1.22846	2.44536	4.79983	3.75107	1.98785		NTW1	0	1.22846	3.67382	8.47365	12.2247	14.2126
NTW1	1.25731	2.40787	4.72984	3.89418	2.41614		NTW1	0	1.25731	3.66518	8.39502	12.2892	14.7053
TW1	2.07244	4.75484	4.93715	3.47769	2.48937		TW1	0	2.07244	6.82728	11.7644	15.2421	17.7315
TW1	2.09058	4.25591	4.91988	2.88517	2.08612		TW1	0	2.09058	6.34649	11.2664	14.1515	16.2377
TW1	1.91568	4.03518	4.85044	3.54266	2.48422		TW1	0	1.91568	5.95087	10.8013	14.344	16.8282
NTC1	1.13364	2.47737	5.02659	3.57899	1.89103		NTC1	0	1.13364	3.61101	8.6376	12.2166	14.1076
NTC1	1.13332	2.1412	4.37853	3.66892	2.33527		NTC1	0	1.13332	3.27451	7.65304	11.322	13.6572
NTC1	1.2195	3.34986	5.61924	4.11967	2.36561		NTC1	0	1.2195	4.56935	10.1886	14.3083	16.6739
TC1	3.27758	5.08228	5.67449	3.61877	2.23816		TC1	0	3.27758	8.35986	14.0344	17.6531	19.8913
TC1	3.27028	5.76891	6.12973	3.72375	2.3073		TC1	0	3.27028	9.03919	15.1689	18.8927	21.2
TC1	3.26841	4.58387	5.64778	3.75818	2.34579		TC1	0	3.26841	7.85228	13.5001	17.2582	19.604
2015-2016
	water storage before sowing	water storage after harvest	ΔS	irrigation volume at the jointing stage	precipitation	ET
NTW1	313.569	238.109	75.46	60	141.3	276.76
NTW1	295.203	228.727	66.476	60	141.3	267.776
NTW1	299.029	219.608	79.421	60	141.3	280.721
TW1	311.697	216.222	95.475	60	141.3	289.784
TW1	300.06	218.566	81.494	60	141.3	289.784
TW1	309.828	227.488	82.34	60	141.3	283.64
NTC1	345.047	236.681	108.366	60	141.3	309.666
NTC1	315.609	224.212	91.397	60	141.3	308.043
NTC1	343.244	221.172	122.072	60	141.3	308.043
TC1	331.936	224.733	107.203	60	141.3	315.491
TC1	344.435	223.256	121.179	60	141.3	315.491
TC1	337.546	219.783	117.763	60	141.3	319.063
2016-2017
	water storage before sowing	water storage after harvest	ΔS	irrigation volume at the jointing stage	precipitation	ET
NTW1	330.081	239.848	90.233	60	157.3	307.533
NTW1	317.476	222.453	95.023	60	157.3	312.323
NTW1	307.582	213.609	93.973	60	157.3	311.273
TW1	310.937	209.032	101.905	60	157.3	319.205
TW1	316.505	212.78	103.725	60	157.3	321.025
TW1	313.551	206.283	107.268	60	157.3	324.568
NTC1	346.018	228.537	117.481	60	157.3	334.781
NTC1	330.866	212.029	118.837	60	157.3	336.137
NTC1	326.836	209.228	117.608	60	157.3	334.908
TC1	341.155	218.109	123.046	60	157.3	340.346
TC1	348.295	225.098	123.197	60	157.3	340.497
TC1	338.126	214.109	124.017	60	157.3	341.317
