# Supplementary material for: Carbon emission and water use efficiency response to tillage methods and planting patterns of winter wheat in the North China Plain
Source: PeerJ. 2020 Sep 15;8:e9912. doi: 10.7717/peerj.9912 (PMC7500349; doi:10.7717/peerj.9912)
Supplement: Supplemental Information 2 — TW, NTC, TW and TC represent no tillage with wide-precision planting, no tillage with conventional planting, conventional tillage with wide-precision planting, and conventional tillage with conventional planting. [file peerj-08-9912-s002.xlsx]

## Sheet: Sheet1
grain yield（g/m2)	2015-16	2016-17		2015-2016
NTW	718.667	754.5			water storage before sowing	water storage after harvest	ΔS	irrigation atjointing stage 量	precipitation	ET
NTW	658.778	747.34		NTW	313.569	238.109	75.46	60	141.3	276.76
NTW	641.667	746.22		NTW	295.203	228.727	66.476	60	141.3	267.776
TW	712.556	852.11		NTW	299.029	219.608	79.421	60	141.3	280.721
TW	728.444	873.89		TW	311.697	216.222	95.475	60	141.3	289.784
TW	741.444	866.33		TW	300.06	218.566	81.494	60	141.3	289.784
NTC	621.667	726.67		TW	309.828	227.488	82.34	60	141.3	283.64
NTC	640	728.33		NTC	345.047	236.681	108.366	60	141.3	309.666
NTC	650	730		NTC	315.609	224.212	91.397	60	141.3	308.043
TC	730	765		NTC	343.244	221.172	122.072	60	141.3	308.043
TC	711.67	778.33		TC	331.936	224.733	107.203	60	141.3	315.491
TC	693.333	761.67		TC	344.435	223.256	121.179	60	141.3	315.491
				TC	337.546	219.783	117.763	60	141.3	319.063
spike number(spike/m2）
	2015-16	2016-17		2016-2017
NTW	643.22	795.222			water storage before sowing	water storage after harvest	ΔS	irrigation atjointing stage 量	precipitation	ET
NTW	622.11	785.111		NTW	330.081	239.848	90.233	60	157.3	307.533
NTW	612	787.111		NTW	317.476	222.453	95.023	60	157.3	312.323
TW	685.11	987.444		NTW	307.582	213.609	93.973	60	157.3	311.273
TW	685.89	986.167		TW	310.937	209.032	101.905	60	157.3	319.205
TW	684.78	983.556		TW	316.505	212.78	103.725	60	157.3	321.025
NTC	543.33	733.333		TW	313.551	206.283	107.268	60	157.3	324.568
NTC	565	740		NTC	346.018	228.537	117.481	60	157.3	334.781
NTC	588.33	750.41		NTC	330.866	212.029	118.837	60	157.3	336.137
TC	676.67	951.667		NTC	326.836	209.228	117.608	60	157.3	334.908
TC	668.33	988.333		TC	341.155	218.109	123.046	60	157.3	340.346
TC	660	968.333		TC	348.295	225.098	123.197	60	157.3	340.497
				TC	338.126	214.109	124.017	60	157.3	341.317
1000 -kernel weight	2015-16	2016-17		2015-16				2016-17
NTW	37.61	37.506		ET	grain yield	WUE		ET	grain yield	WUE
NTW	37.96	37.198		276.76	673.037	2.43184	2.4476	307.533	749.354	2.43666
NTW	37.78	36.947		267.776	673.037	2.51343		312.323	749.354	2.39929
TW	35.638	37.102		280.721	673.037	2.39753		311.273	749.354	2.40739
TW	34.996	36.732		289.784	734.148	2.53343	2.55172	319.205	864.111	2.70707
TW	35.158	36.156		289.784	734.148	2.53343		321.025	864.111	2.69173
NTC	39.841	37.402		283.64	734.148	2.58831		324.568	864.111	2.66234
NTC	39.552	37.965		309.666	637.222	2.05777	2.065	334.781	728.332	2.17555
NTC	39.157	37.328		308.043	637.222	2.06861		336.137	728.332	2.16677
TC	39.138	36.984		308.043	637.222	2.06861		334.908	728.332	2.17472
TC	38.155	37.324		315.491	711.668	2.25575	2.24733	340.346	768.334	2.25751
TC	38.176	36.914		315.491	711.668	2.25575		340.497	768.334	2.25651
				319.063	711.668	2.23049		341.317	768.334	2.25109
Kernel numbers per spike	2015-16	2016-17
NTW	42.567	41.8667
NTW	42	42.3333
NTW	41.485	40.2727
TW	40	39.5
TW	39.067	39
TW	39.2143	39.25
NTC	42.6667	42.7143
NTC	44.375	43.73
NTC	43	44.75
TC	41.85	40.79
TC	41.4	40.1333
TC	40.8	40.1333
