# Supplementary material for: Carbon emission and water use efficiency response to tillage methods and planting patterns of winter wheat in the North China Plain
Source: PeerJ. 2020 Sep 15;8:e9912. doi: 10.7717/peerj.9912 (PMC7500349; doi:10.7717/peerj.9912)
Supplement: Supplemental Information 3 — Total precipitation in Oct was from seeding time to end of Oct and total precipitation in Jun was from beginning of Jun to the harvest time. [file peerj-08-9912-s003.xlsx]

## Sheet: Sheet1
		2015-2016				2016-2017				2015-2016		2016-2017
		temperature	rainfall			temperature	rainfall			rainfall	temperature	rainfall	temperature
	2015-10-07 23:59:55	18.48	8.1		2016-10-07	18.71	0		Oct	16.9	15.3472	25	15.5556
	2015-10-08 06:10:24	16.17	0.1		2016-10-08	18.14	0.2		Nov	64.7	7.0682	19.9	8.0791
	2015-10-09 06:17:36	14.16	0		2016-10-09	17.01	0		Dec	1.3	2.548	11.8	3.33881
	2015-10-10 05:52:08	13.64	0		2016-10-10	12.99	0		Jan	2.2	-1.36229	12.2	1.40381
	2015-10-11 06:00:22	14.06	0		2016-10-11	15.68	0		Feb	10.9	3.6981	4.3	3.99257
	2015-10-12 06:08:35	14.54	0		2016-10-12	17.36	0		Mar	0	10.8217	13.8	9.212
	2015-10-13 06:16:48	15.5	0		2016-10-13	16.79	0		Apr	6.7	18.2203	32.6	16.3683
	2015-10-14 05:51:19	18.02	0.4		2016-10-14	18.04	0		May	38.6	20.8487	24.1	23.6684
	2015-10-15 05:59:29	19.69	0		2016-10-15	18.25	0		Jun	0	24.98	13.6	27.6567
	2015-10-16 06:08:41	17.7	0		2016-10-16	16.37	13.5			141.3		157.3
	2015-10-17 06:16:53	18.18	0		2016-10-17	16.75	0.9
	2015-10-18 06:24:03	18.88	0		2016-10-18	17.72	0
	2015-10-19 05:24:46	18.18	0		2016-10-19	17.9	0
	2015-10-20 06:06:44	18.1	0		2016-10-20	18.63	0
	2015-10-21 06:14:55	18.1	0		2016-10-21	18.84	0
	2015-10-22 06:24:06	17.68	0		2016-10-22	17.49	1.2
	2015-10-23 06:32:17	15.97	0		2016-10-23	15.15	1.8
	2015-10-24 06:05:48	16.48	0		2016-10-24	10.98	5.7
	2015-10-25 06:47:40	15.28	1.1		2016-10-25	11.65	0.9
	2015-10-26 23:47:16	12.06	7.1		2016-10-26	13.62	0.4
	2015-10-27 05:56:46	10.86	0.1		2016-10-27	14.4	0.2
	2015-10-28 06:05:00	11.89	0		2016-10-28	13.87	0.1
	2015-10-29 06:14:13	12.48	0		2016-10-29	11.79	0
	2015-10-30 06:21:27	8.76	0		2016-10-30	10.02	0
	2015-10-31 05:56:02	8.82	0		2016-10-31	10.74	0.1
	2015-11-01 06:37:57	10.57	0		2016-11-01	7.902	0
	2015-11-02 06:47:12	9.65	0		2016-11-02	5.131	8.5
	2015-11-03 06:20:45	11.04	0		2016-11-03	8.54	0
	2015-11-04 06:30:00	13.01	0		2016-11-04	9.99	0
	2015-11-05 06:03:32	12.41	0.9		2016-11-05	14.15	0
	2015-11-06 23:35:50	10.51	31.9		2016-11-06	15.49	0
	2015-11-07 06:21:00	8.34	0.9		2016-11-07	12.62	0
	2015-11-08 23:52:20	7.184	0.8		2016-11-08	9.78	7.4
	2015-11-09 06:37:31	7.534	0		2016-11-09	6.062	1.1
	2015-11-10 23:36:11	7.536	0		2016-11-10	5.83	0
	2015-11-11 23:44:26	9.22	0		2016-11-11	8.43	0
	2015-11-12 07:01:17	10	0		2016-11-12	10.61	0
	2015-11-13 23:59:54	10.11	7.3		2016-11-13	12.75	0
	2015-11-14 06:45:05	11.14	0.1		2016-11-14	13.11	0
	2015-11-15 23:42:40	12.25	0.3		2016-11-15	11.62	0
	2015-11-16 06:26:50	12.12	1.2		2016-11-16	9.67	0
	2015-11-17 06:36:04	10.22	0		2016-11-17	11.07	0
	2015-11-18 06:43:18	6.992	4.2		2016-11-18	11.34	0
	2015-11-19 23:41:58	7.758	0		2016-11-19	12.24	0.7
	2015-11-20 21:35:24	9.6	0		2016-11-20	12.86	0.3
	2015-11-21 23:25:47	9.71	1.4		2016-11-21	10.53	0.1
	2015-11-22 23:33:02	7.622	1.8		2016-11-22	7.895	0.1
	2015-11-23 23:41:20	3.143	1.2		2016-11-23	-1.783	0
	2015-11-24 23:34:10	-1.189	1.2		2016-11-24	-1.865	1.6
	2015-11-25 07:54:28	-2.75	0.1		2016-11-25	-0.924	0.1
	2015-11-26 07:11:10	-4.871	0		2016-11-26	1.586	0
	2015-11-27 06:48:40	-2.978	0		2016-11-27	4.578	0
	2015-11-28 06:57:57	2.262	6.2		2016-11-28	4.203	0
	2015-11-29 23:55:41	1.897	4.9		2016-11-29	3.405	0
	2015-11-30 21:50:17	2.006	0.3		2016-11-30	5.553	0
	2015-12-01 23:05:55	6.579	0		2016-12-01	6.865	0
	2015-12-02 06:56:28	5.224	0		2016-12-02	5.792	0
	2015-12-03 07:05:45	2.79	0		2016-12-03	4.668	0
	2015-12-04 06:39:15	1.339	0		2016-12-04	6.068	0
	2015-12-05 23:37:59	0.765	0		2016-12-05	6.453	0
	2015-12-06 06:56:42	1.28	0		2016-12-06	3.982	0
	2015-12-07 23:54:26	3.95	0		2016-12-07	3.153	0
	2015-12-08 07:12:18	6.028	0		2016-12-08	5.347	0
	2015-12-09 23:38:18	7.202	0		2016-12-09	6.432	0
	2015-12-10 06:22:28	7.764	0		2016-12-10	4.034	0
	2015-12-11 07:03:25	3.01	0		2016-12-11	2.54	0
	2015-12-12 07:12:44	2.272	0		2016-12-12	3.879	0
	2015-12-13 06:46:21	2.556	0		2016-12-13	6.37	0.2
	2015-12-14 23:45:05	3.009	0		2016-12-14	3.297	0.5
	2015-12-15 07:02:57	2.752	0		2016-12-15	0.703	0
	2015-12-16 07:11:15	1.087	0		2016-12-16	-0.032	0
	2015-12-17 07:19:23	-1.774	0		2016-12-17	1.25	0
	2015-12-18 06:53:41	-0.976	0		2016-12-18	5.578	0
	2015-12-19 07:01:51	1.34	0		2016-12-19	4.24	0
	2015-12-20 07:11:07	2.443	0		2016-12-20	3.957	0
	2015-12-21 07:18:19	1.217	0		2016-12-21	5.474	0
	2015-12-22 23:09:38	3.733	1.2		2016-12-22	5.076	0.8
	2015-12-23 07:01:11	4.745	0		2016-12-23	3.862	0.3
	2015-12-24 07:10:28	4.221	0		2016-12-24	1.444	2.4
	2015-12-25 23:34:32	0.223	0		2016-12-25	1.6	0
	2015-12-26 06:19:37	1.297	0.1		2016-12-26	2.512	2.8
	2015-12-27 07:00:34	-0.711	0		2016-12-27	2.52	3.1
	2015-12-28 07:09:53	0.538	0		2016-12-28	-0.735	1.7
	2015-12-29 23:33:57	1.578	0		2016-12-29	-1.29	0
	2015-12-30 06:51:50	2.21	0		2016-12-30	-1.199	0
	2015-12-31 07:00:03	1.297	0		2016-12-31	-0.337	0
	2016-01-01 07:08:17	5.603	0		2017-01-01	0.886	0
	2016-01-02 07:16:35	4.395	0		2017-01-02	3.367	0
	2016-01-03 06:52:12	4.37	0		2017-01-03	2.718	0
	2016-01-04 06:25:48	4.265	0		2017-01-04	2.063	0.1
	2016-01-05 23:59:12	3.54	0		2017-01-05	3.766	0
	2016-01-06 22:59:09	0.991	1.8		2017-01-06	6.084	3.4
	2016-01-07 07:24:12	-2.29	0.4		2017-01-07	5.54	0
	2016-01-08 06:59:34	-2.657	0		2017-01-08	4.766	4
	2016-01-09 07:06:31	-2.04	0		2017-01-09	2.769	0.1
	2016-01-10 07:15:40	2.332	0		2017-01-10	0.713	0
	2016-01-11 23:40:45	0.059	0		2017-01-11	0.937	0
	2016-01-12 06:58:29	-3.32	0		2017-01-12	0.62	0
	2016-01-13 07:06:28	-3.304	0		2017-01-13	0.866	0
	2016-01-14 07:13:23	-1.938	0		2017-01-14	1.155	0.1
	2016-01-15 07:21:27	-1.383	0		2017-01-15	-0.549	0
	2016-01-16 07:29:29	0.792	0		2017-01-16	-1.201	0
	2016-01-17 07:05:04	-1.375	0		2017-01-17	-0.014	0
	2016-01-18 07:12:09	-4.655	0		2017-01-18	1.09	0
	2016-01-19 07:20:07	-4.428	0		2017-01-19	1.255	0
	2016-01-20 07:28:03	-2.002	0		2017-01-20	1.209	0
	2016-01-21 07:02:37	-1.378	0		2017-01-21	-3.089	0
	2016-01-22 22:54:39	-5.077	0		2017-01-22	-0.656	0
	2016-01-23 07:18:41	-10.55	0		2017-01-23	-1.464	0
	2016-01-24 06:52:54	-10.23	0		2017-01-24	-1.454	0
	2016-01-25 07:00:49	-5.433	0		2017-01-25	-0.522	0
	2016-01-26 07:08:44	-3.566	0		2017-01-26	1.186	0
	2016-01-27 07:17:39	-2.339	0		2017-01-27	7.144	0
	2016-01-28 23:41:37	2.64	0		2017-01-28	2.637	0
	2016-01-29 06:59:30	0.971	0		2017-01-29	1.714	1.2
	2016-01-30 23:25:36	-1.881	0		2017-01-30	1.696	3.3
	2016-01-31 06:43:29	-2.343	0		2017-01-31	-1.714	0
	2016-02-01 06:50:35	-3.343	0		2017-02-01	-0.23	0
	2016-02-02 06:58:33	-2.353	0		2017-02-02	0.267	0
	2016-02-03 07:07:25	-0.236	0		2017-02-03	0.683	0
	2016-02-04 07:14:44	2.61	0		2017-02-04	3.817	0
	2016-02-05 07:24:03	1.669	0		2017-02-05	4.191	0
	2016-02-06 06:58:28	0.437	0		2017-02-06	4.888	0
	2016-02-07 07:06:32	0.308	0		2017-02-07	3.03	0
	2016-02-08 06:40:01	5.175	0		2017-02-08	1.439	0
	2016-02-09 07:21:58	8.19	0		2017-02-09	1.748	0
	2016-02-10 06:57:33	9.79	0		2017-02-10	0.051	0
	2016-02-11 23:56:12	10.87	0		2017-02-11	-0.367	0
	2016-02-12 06:40:21	10.73	0.8		2017-02-12	0.626	0
	2016-02-13 23:39:02	3.727	5.8		2017-02-13	3.314	0
	2016-02-14 06:55:54	-2.029	0.1		2017-02-14	6.148	0
	2016-02-15 06:30:12	-0.336	0.2		2017-02-15	8.15	0
	2016-02-16 06:39:28	2.689	0.4		2017-02-16	9.29	0
	2016-02-17 06:46:40	3.894	0.3		2017-02-17	11.19	0
	2016-02-18 06:54:56	7.201	0.3		2017-02-18	4.18	0
	2016-02-19 07:04:13	6.142	0.1		2017-02-19	6.51	0
	2016-02-20 07:11:28	2.386	0.1		2017-02-20	12.05	0
	2016-02-21 06:46:58	2.344	0.3		2017-02-21	4.623	0
	2016-02-22 06:54:15	6.117	0.3		2017-02-22	-0.055	0
	2016-02-23 06:28:51	4.008	0.1		2017-02-23	0.447	4.3
	2016-02-24 06:37:07	1.709	0.3		2017-02-24	3.331	0
	2016-02-25 06:45:19	3.781	0.3		2017-02-25	3.718	0
	2016-02-26 06:53:34	5.948	0.2		2017-02-26	5.323	0
	2016-02-27 06:28:10	7.276	0.2		2017-02-27	5.788	0
	2016-02-28 06:36:25	5.576	0.1		2017-02-28	7.642	0
	2016-02-29 06:44:43	2.965	1		2017-03-01	10.8	0
	2016-03-01 06:53:00	5.187	0		2017-03-02	5.522	0
	2016-03-02 06:27:36	9.96	0		2017-03-03	5.398	0.6
	2016-03-03 06:36:52	13.92	0		2017-03-04	9	0
	2016-03-04 06:44:03	16.68	0		2017-03-05	9.12	0
	2016-03-05 06:53:15	12.19	0		2017-03-06	7.122	0
	2016-03-06 06:27:48	10.9	0		2017-03-07	5.924	0
	2016-03-07 06:35:02	10.26	0		2017-03-08	5.421	0
	2016-03-08 06:10:36	5.459	0		2017-03-09	5.79	0
	2016-03-09 06:17:54	2.482	0		2017-03-10	7.529	0
	2016-03-10 06:27:08	2.476	0		2017-03-11	9.65	0
	2016-03-11 06:34:15	3.295	0		2017-03-12	12.68	0
	2016-03-12 06:08:52	5.622	0		2017-03-13	10.77	0.1
	2016-03-13 05:44:27	8.39	0		2017-03-14	6.68	0
	2016-03-14 06:26:24	7.632	0		2017-03-15	7.286	0
	2016-03-15 06:34:40	8.83	0		2017-03-16	9.09	0
	2016-03-16 06:09:14	10.15	0		2017-03-17	10.4	0
	2016-03-17 06:16:27	13.96	0		2017-03-18	10.49	0
	2016-03-18 06:24:40	14.38	0		2017-03-19	13.35	0
	2016-03-19 06:00:12	15.88	0		2017-03-20	13.75	0
	2016-03-20 06:07:23	14.02	0		2017-03-21	11.28	0
	2016-03-21 06:15:37	13.82	0		2017-03-22	10.07	0
	2016-03-22 06:23:49	13.3	0		2017-03-23	10.75	0
	2016-03-23 06:07:51	10.12	0		2017-03-24	10.52	0.7
	2016-03-24 06:06:37	8.72	0		2017-03-25	8.68	3.4
	2016-03-25 06:14:52	9.7	0		2017-03-26	7.98	0.1
	2016-03-26 06:23:07	10.24	0		2017-03-27	9.16	0
	2016-03-27 05:57:40	12.04	0		2017-03-28	10.9	0
	2016-03-28 06:05:55	15.43	0		2017-03-29	8.56	8.9
	2016-03-29 06:14:06	16.46	0		2017-03-30	9.09	0
	2016-03-30 06:23:19	16.38	0		2017-03-31	12.81	0
	2016-03-31 05:56:50	17.59	0		2017-04-01	10.89	1
	2016-04-01 06:05:02	18.77	0		2017-04-02	13.25	0
	2016-04-02 06:13:11	16.21	0		2017-04-03	15.15	0
	2016-04-03 06:22:23	13.99	0		2017-04-04	17.46	0
	2016-04-04 05:56:56	12.89	0		2017-04-05	14.32	9.3
	2016-04-05 06:04:08	16.04	0		2017-04-06	13.24	0.3
	2016-04-06 05:56:01	16.19	0		2017-04-07	15.42	0
	2016-04-07 05:46:51	17.37	0		2017-04-08	16.71	0
	2016-04-08 05:55:02	18.45	0		2017-04-09	13.84	0.2
	2016-04-09 06:36:53	19.33	0		2017-04-10	13.27	0
	2016-04-10 06:11:17	18.55	0		2017-04-11	11.7	0.5
	2016-04-11 05:46:53	15.74	0		2017-04-12	13.11	0
	2016-04-12 05:54:05	16.87	0		2017-04-13	15.32	0
	2016-04-13 06:03:17	19.24	0		2017-04-14	17.59	5.2
	2016-04-14 05:36:46	21.41	0		2017-04-15	16.92	0
	2016-04-15 05:45:56	21.23	0		2017-04-16	19.11	0
	2016-04-16 23:51:50	15.05	5.9		2017-04-17	19.29	11.6
	2016-04-17 04:54:58	13.76	0.8		2017-04-18	19.99	0.1
	2016-04-18 05:36:51	15.74	0		2017-04-19	19.78	0
	2016-04-19 05:11:22	18.51	0		2017-04-20	15.84	3.9
	2016-04-20 05:18:32	19.93	0		2017-04-21	16.35	0.1
	2016-04-21 05:27:43	20.21	0		2017-04-22	15.72	0
	2016-04-22 05:34:52	22.51	0		2017-04-23	15.81	0
	2016-04-23 05:43:02	19.88	0		2017-04-24	19.89	0
	2016-04-24 05:18:32	18.65	0		2017-04-25	20.72	0
	2016-04-25 05:26:43	20.49	0		2017-04-26	15.38	0.4
	2016-04-26 05:34:52	17.9	0		2017-04-27	15.24	0
	2016-04-27 05:08:23	18.41	0		2017-04-28	16.73	0
	2016-04-28 05:16:34	19.33	0		2017-04-29	20.43	0
	2016-04-29 05:24:44	19.9	0		2017-04-30	22.58	0
	2016-04-30 05:00:14	24.06	0		2017-05-01	24.38	0
	2016-05-01 05:08:22	24.96	0		2017-05-02	24.5	0
	2016-05-02 05:16:30	20.13	2.3		2017-05-03	23.79	0
	2016-05-03 04:50:00	18.24	0		2017-05-04	20.02	9.8
	2016-05-04 04:58:11	22.67	0		2017-05-05	19.45	3.1
	2016-05-05 05:06:22	26.39	0		2017-05-06	18.7	0
	2016-05-06 05:14:28	21.72	0		2017-05-07	18.39	0
	2016-05-07 05:22:37	20.48	0		2017-05-08	21.29	0
	2016-05-08 03:49:39	18.59	0.3		2017-05-09	19.89	0
	2016-05-09 23:37:43	14.48	6.6		2017-05-10	20.5	0
	2016-05-10 05:14:31	18.04	0		2017-05-11	24.1	0
	2016-05-11 04:48:01	21.96	0		2017-05-12	24.63	0
	2016-05-12 22:53:48	18.99	0		2017-05-13	24.22	0
	2016-05-13 05:04:17	16.48	0		2017-05-14	23.69	0
	2016-05-14 23:43:53	14.71	20.7		2017-05-15	21.36	0
	2016-05-15 05:20:40	16.04	3.6		2017-05-16	20.82	1.1
	2016-05-16 04:55:11	19.58	0		2017-05-17	20.97	0
	2016-05-17 05:04:22	21.64	0		2017-05-18	25.06	0
	2016-05-18 05:11:32	21.29	0		2017-05-19	27.25	0
	2016-05-19 04:46:01	22.23	0		2017-05-20	27.11	0
	2016-05-20 04:54:10	21.86	0		2017-05-21	26.8	0
	2016-05-21 05:35:59	22.82	0		2017-05-22	25.43	0
	2016-05-22 05:10:28	23.71	0		2017-05-23	25.71	1.2
	2016-05-23 23:50:01	20.64	0		2017-05-24	19.13	8.9
	2016-05-24 04:53:00	21.84	0		2017-05-25	22.42	0
	2016-05-25 05:02:16	23.81	0		2017-05-26	23.39	0
	2016-05-26 05:09:24	22.99	0		2017-05-27	23.36	0
	2016-05-27 23:49:56	20.16	0.3		2017-05-28	29.06	0
	2016-05-28 22:49:47	17.22	3.6		2017-05-29	29.87	0
	2016-05-29 05:01:14	22.53	0		2017-05-30	29.64	0
	2016-05-30 04:35:43	24.85	0		2017-05-31	28.79	0
	2016-05-31 04:43:50	25.26	1.2		2017-06-01	28.05	0
	2016-06-01 04:50:59	24.98	0		2017-06-02	28.21	0
					2017-06-03	26.71	13.6
